# Supplementary material for: Quantitative Assessment of Asymmetric Choroidal Outflow in Pachychoroid Eyes on Ultra-Widefield Indocyanine Green Angiography
Source: PubMed Central journal article supplement — Invest Ophthalmol Vis Sci. 2020 Jul 31;61(8):50. doi: 10.1167/iovs.61.8.50 (PMC7425745; doi:10.1167/iovs.61.8.50), 2020-07-31
Supplement: iovs-61-8-50_s001.pdf [file iovs-61-8-50_s001.pdf]

**SUPPLEMENTAL TABLES**

**Table 2-A. Multivariate Regression Analysis Comparing Brightness Levels Between Quadrants in Eyes with Central Serous Chorioretinopathy (CSC)**

| Quadrants       | Coefficient            | Standard Error | t-statistic | p-value            | 95% Confidence Interval |       |
|-----------------|------------------------|----------------|-------------|--------------------|-------------------------|-------|
|                 |                        |                |             |                    | Lower                   | Upper |
| Supero-nasal    | <i>Reference group</i> | -              | -           | -                  | -                       | -     |
| Supero-temporal | 1.33                   | 1.60           | 0.83        | 0.412              | -1.89                   | 4.54  |
| Infero-nasal    | 11.03                  | 1.52           | 7.26        | <b>&lt; 0.001*</b> | 7.98                    | 14.07 |
| Infero-temporal | 16.36                  | 1.87           | 8.76        | <b>&lt; 0.001*</b> | 12.61                   | 20.10 |

Multivariate linear regression analysis was performed comparing average brightness level between quadrants in eyes with central serous chorioretinopathy, controlling for patient-eye-specific fixed effects (i.e. including indicator variables for the interaction between patient and eye). More positive values corresponding to brighter quadrants. Bold (\*) values denote significance set at  $p < 0.05$ .

**Table 2-B. Multivariate Regression Analysis Comparing Brightness Levels Between Quadrants in Eyes with Pachychoroid Pigment Epitheliopathy (PPE)**

| Quadrants       | Coefficient            | Standard Error | t-statistic | p-value            | 95% Confidence Interval |       |
|-----------------|------------------------|----------------|-------------|--------------------|-------------------------|-------|
|                 |                        |                |             |                    | Lower                   | Upper |
| Supero-nasal    | <i>Reference group</i> | -              | -           | -                  | -                       | -     |
| Supero-temporal | 0.64                   | 2.88           | 0.22        | 0.826              | -5.19                   | 6.47  |
| Infero-nasal    | 7.06                   | 2.86           | 2.46        | <b>0.018*</b>      | 1.26                    | 12.85 |
| Infero-temporal | 18.43                  | 3.96           | 4.66        | <b>&lt; 0.001*</b> | 10.42                   | 26.43 |

Multivariate linear regression analysis was performed comparing average brightness level between quadrants in eyes with pachychoroid pigment epitheliopathy ( $n = 14$ ), controlling for patient-eye-specific fixed effects (i.e. including indicator variables for the interaction between patient and eye). More positive values corresponding to brighter quadrants. Bold (\*) values denote significance set at  $p < 0.05$ .

**Table 4-A. Multivariate Regression Analysis Comparing Brightness Levels Between Quadrants in Eyes with Central Serous Chorioretinopathy (CSC) Adjusted for Values from Control Eyes**

| Quadrants       | Coefficient            | Standard Error | t-statistic | p-value       | 95% Confidence Interval |       |
|-----------------|------------------------|----------------|-------------|---------------|-------------------------|-------|
|                 |                        |                |             |               | Lower                   | Upper |
| Supero-nasal    | <i>Reference group</i> | -              | -           | -             | -                       | -     |
| Supero-temporal | 1.18                   | 2.79           | 0.42        | 0.672         | -4.36                   | 6.73  |
| Infero-nasal    | 7.04                   | 2.52           | 2.79        | <b>0.006*</b> | 2.03                    | 12.05 |
| Infero-temporal | 6.64                   | 2.73           | 2.43        | <b>0.017*</b> | 1.22                    | 12.06 |

Multivariate linear regression analysis was performed comparing average brightness level between quadrants in eyes with central serous chorioretinopathy, after adjusting for preferential, non-uniform drainage in controls eyes. Patient-eye-specific fixed effects were controlled in the regression (i.e. including indicator variables for the interaction between patient and eye). More positive values corresponding to brighter quadrants. Bold (\*) values denote significance set at  $p < 0.05$ .

**Table 4-B. Multivariate Regression Analysis Comparing Brightness Levels Between Quadrants in Eyes with Pachychoroid Pigment Epitheliopathy (PPE) Adjusted for Values from Control Eyes**

| Quadrants       | Coefficient            | Standard Error | t-statistic | p-value | 95% Confidence Interval |       |
|-----------------|------------------------|----------------|-------------|---------|-------------------------|-------|
|                 |                        |                |             |         | Lower                   | Upper |
| Supero-nasal    | <i>Reference group</i> | -              | -           | -       | -                       | -     |
| Supero-temporal | 0.50                   | 3.68           | 0.14        | 0.893   | -6.82                   | 7.81  |
| Infero-nasal    | 3.07                   | 3.50           | 0.88        | 0.383   | -3.89                   | 10.03 |
| Infero-temporal | 8.71                   | 4.42           | 1.97        | 0.052   | -0.09                   | 17.50 |

Multivariate linear regression analysis was performed comparing average brightness level between quadrants in eyes with pachychoroid pigment epitheliopathy ( $n = 14$ ), after adjusting for preferential, non-uniform drainage in controls eyes. Patient-eye-specific fixed effects were controlled in the regression (i.e. including indicator variables for the interaction between patient and eye). More positive values corresponding to brighter quadrants. Bold (\*) values denote significance set at  $p < 0.05$ .
